# Supplementary material for: Photo- and thermo-responsive supramolecular polymer networks via in situ polymerization using homoternary macrocyclic host with coumarin monomers in water
Source: Royal Society of Chemistry journal article supplement (doi:10.1039/d2py00952h), 2022-01-01
Supplement: d2py00952h1.pdf [file d2py00952h1.pdf]

## Supporting Information

# Photo- and thermo-responsive supramolecular polymer networks *via in situ* polymerization using homoternary macrocyclic host with coumarin monomers in water

Shintaro Kawano,<sup>\*a</sup> Kohei Nakano,<sup>b</sup> Hirofumi Sato,<sup>a</sup> Masahiro Muraoka<sup>b</sup> and Motohiro Shizuma<sup>a</sup>

<sup>a</sup> Osaka Research Institute of Industrial Science and Technology (ORIST), 1-5-60 Morinomiya, Joto-ku, Osaka 536-8553, JAPAN. E-mail: skawano@orist.jp

<sup>b</sup> Department of Applied Chemistry, Faculty of Engineering, Osaka Institute of Technology (OIT), 5-16-1 Omiya, Asahi-ku, Osaka 535-8585, JAPAN.

## Contents

1. Characterization of polymerizable coumarin monomer (MABC) (**Figs. S1-S8**)
2. Characterization of host–guest complex (**Figs. S9-S11**)
3. Photodimerization of guest monomer with or without  $\gamma$ -CD host (**Fig. S12**)
4. Photographs of polymerization products (**Fig. S13**)
5. FT-IR spectroscopy (**Fig. S14**)
6. Characterization of PDMAEMA-MABC by redox polymerization (**Fig. S15**)
7. Characterization of rheological property of PDMAEMA-MABC (**Figs. S16, S17**)
8. Characterization of thermo-responsive property of PDMAEMA-MABC/ $\gamma$ -CD hydrogel (**Fig. S18**)

## 1. Characterization of polymerizable coumarin monomer (MABC)

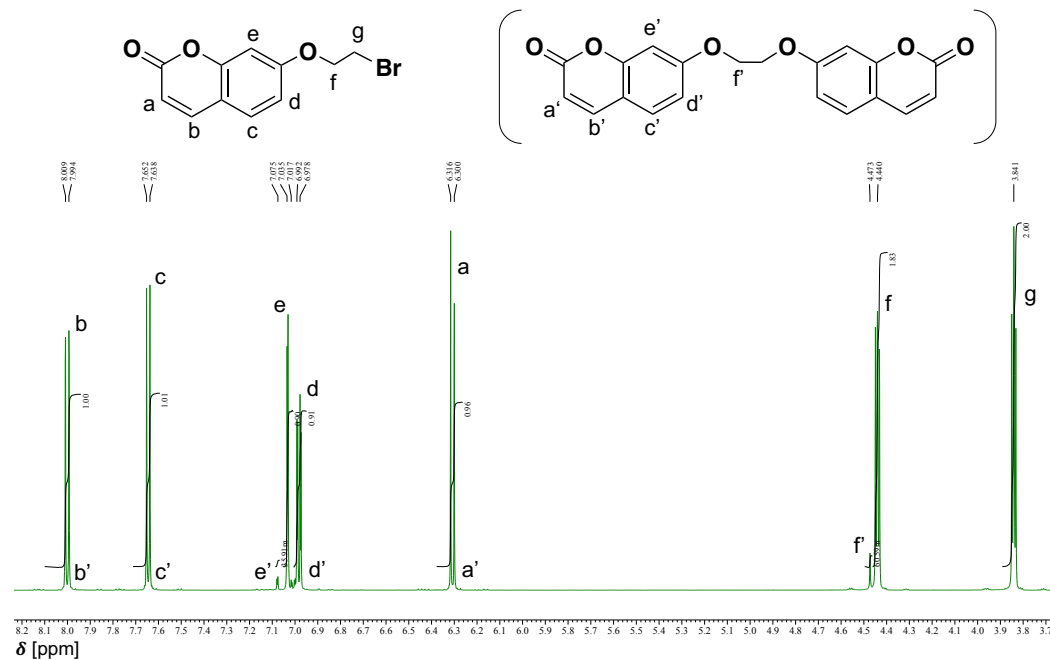

**Fig. S1**  $^1\text{H}$  NMR spectrum (600 MHz,  $\text{DMSO-}d_6$ ) of Br-COU. A by-product (2.6%) was also present.

**Br-COU** ( $M_1$ :  $\text{C}_{11}\text{H}_9\text{O}_3\text{Br}$ , exact mass 269.10)  
 $m/z$  270.10,  $[\text{M}_1 + \text{H}]^+$   
 $m/z$  292.99,  $[\text{M}_1 + \text{Na}]^+$

**By-product:** ( $M_2$ :  $\text{C}_{20}\text{H}_{14}\text{O}_6$ , exact mass 350.34)  
 $m/z$  351.09,  $[\text{M}_2 + \text{H}]^+$   
 $m/z$  373.07,  $[\text{M}_2 + \text{Na}]^+$

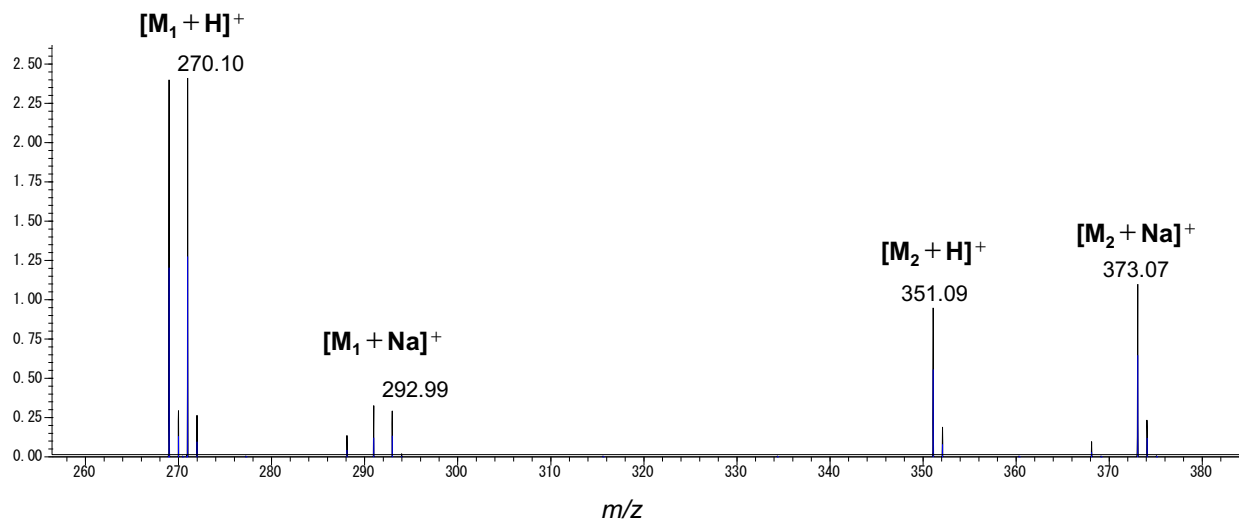

**Fig. S2** Electrospray ionization mass (ESI-MS) spectrum (positive) of Br-COU. A by-product comprising a coumarin dimer linked by ethane-1,2-diol was detected.

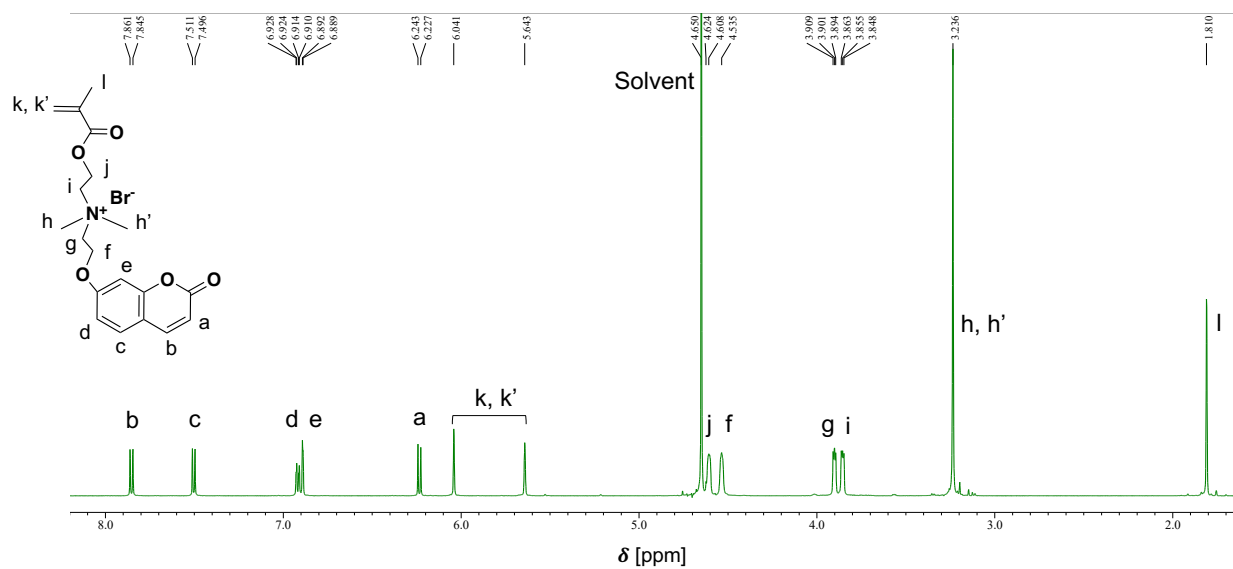

**Fig. S3**  $^1\text{H}$  NMR (600 MHz,  $\text{D}_2\text{O}$ ) spectrum of MABC.

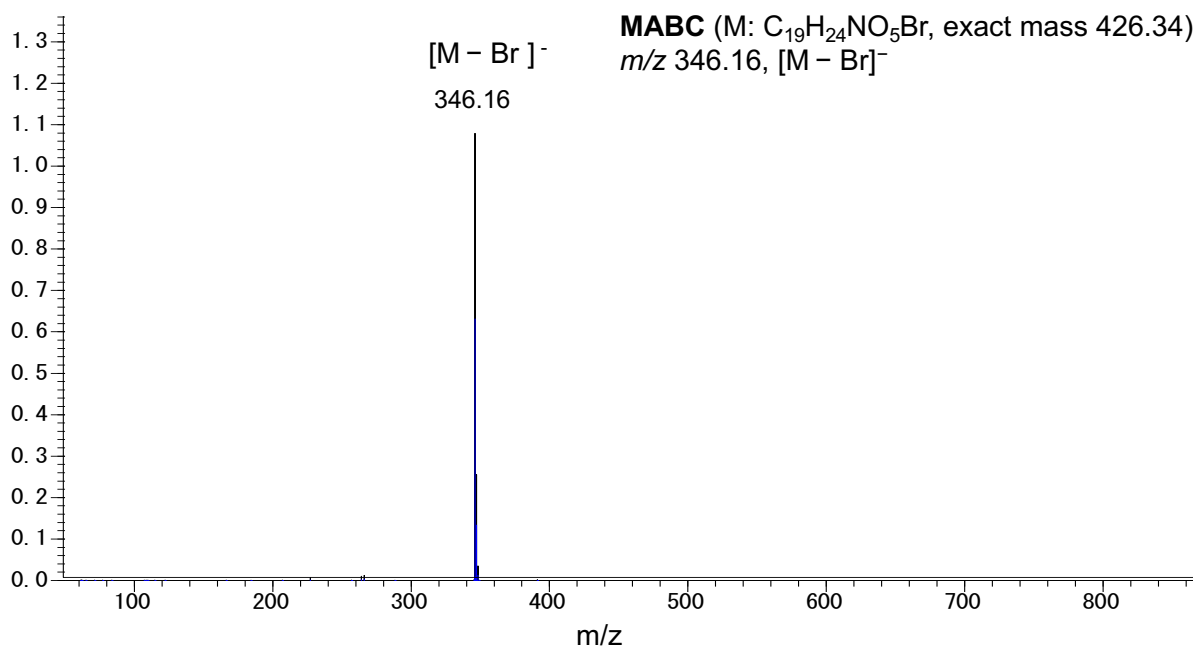

**Fig. S4** ESI-MS spectrum (positive) of MABC.

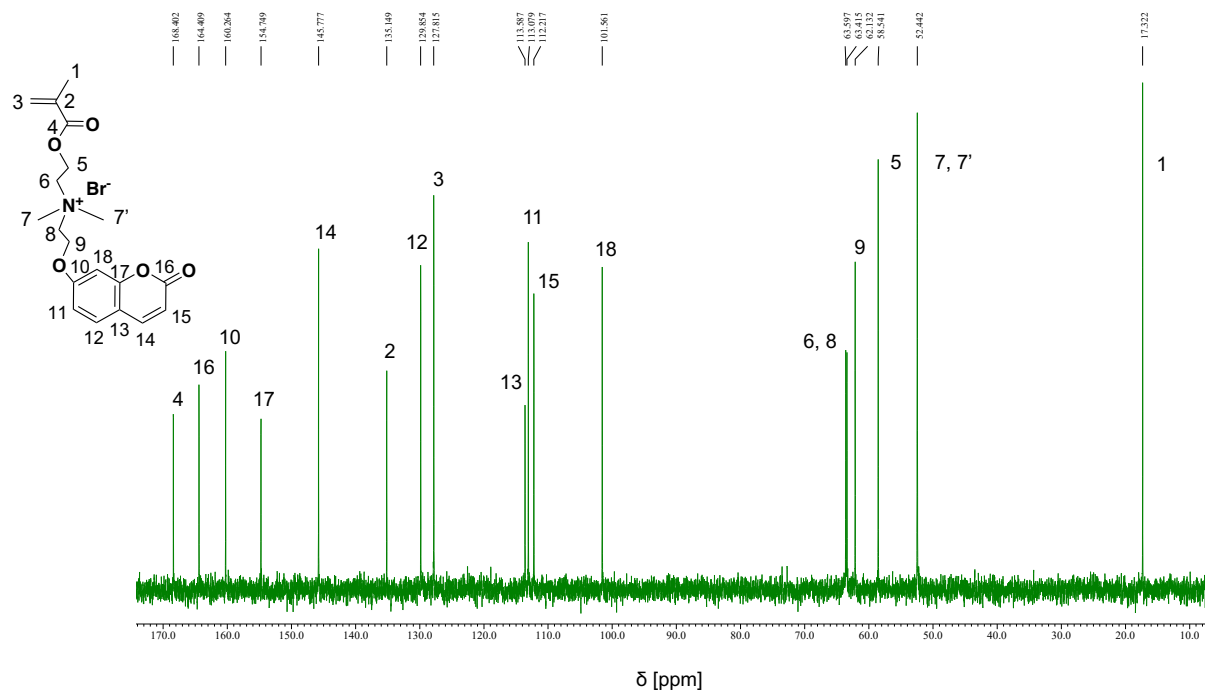

**Fig. S5**  $^{13}\text{C}$  NMR spectrum of MABC in  $\text{D}_2\text{O}$ .

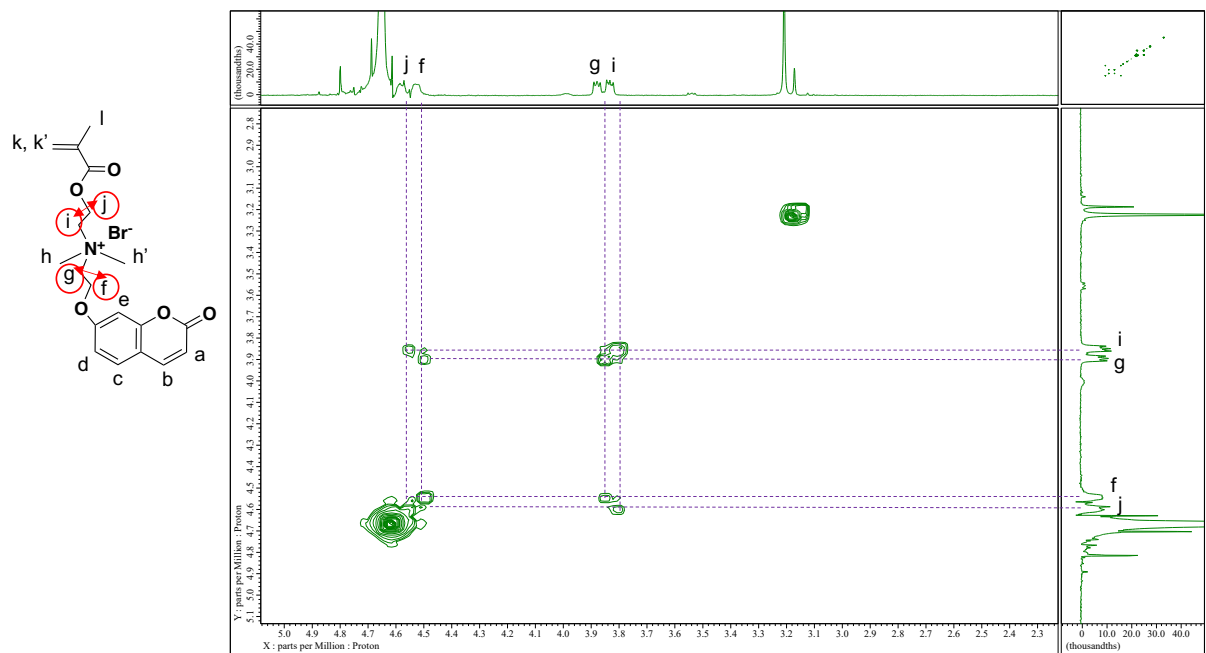

**Fig. S6** H-H COSY spectrum of MABC in  $\text{D}_2\text{O}$ .

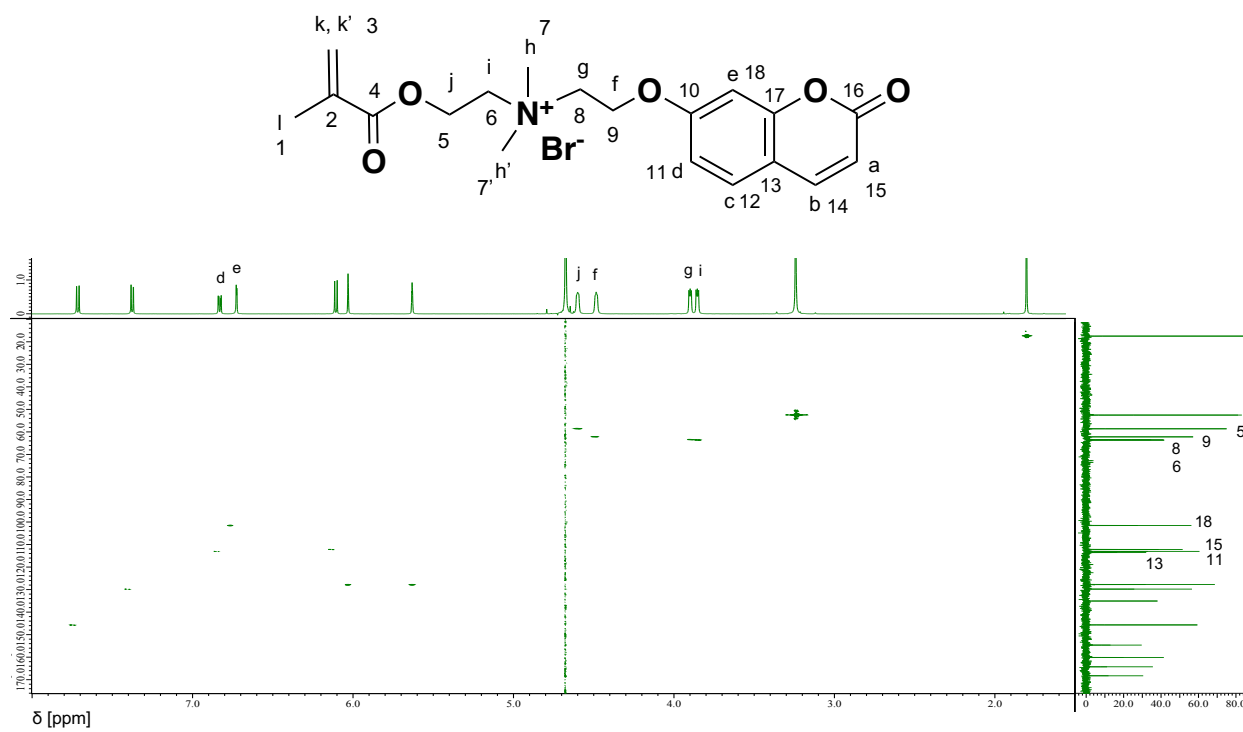

**Fig. S7** HMQC spectrum of MABC in D<sub>2</sub>O.

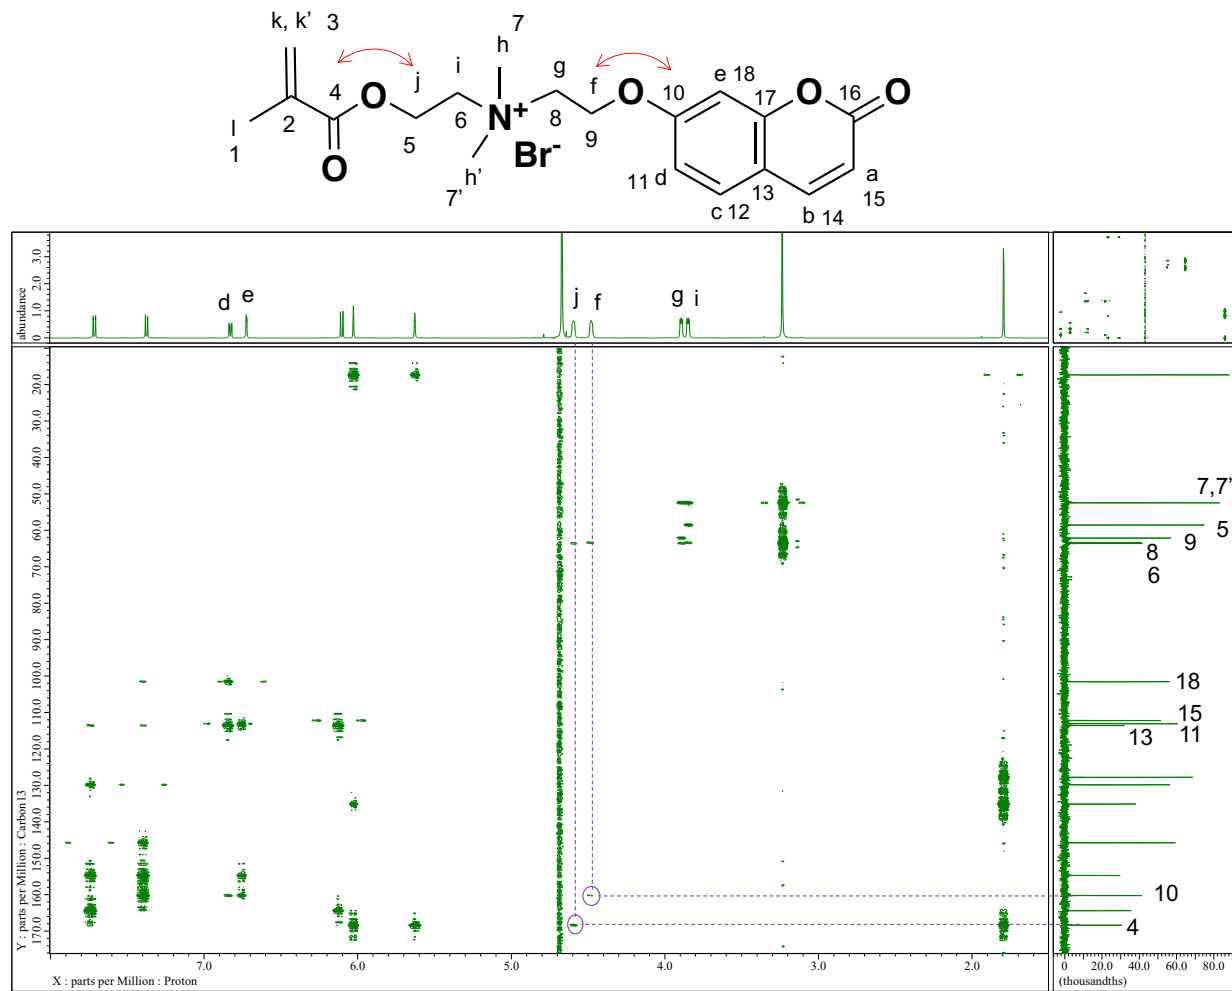

**Fig. S8** HMBC spectrum of MABC in D<sub>2</sub>O.

## 2. Characterization of host-guest complex

There was an upfield shift in the peak attributable to the H-3 and H-5 protons of  $\gamma$ -CD upon inclusion of MABC in  $\gamma$ -CD. The total concentration,  $[\gamma\text{-CD}]_0 + [\text{MABC}]_0$  was 11.76 mM (constant). Each subtracted shift change from the original H-5 position was also recorded for each molar fraction of  $\gamma$ -CD. The plot reached a maximum at a ratio of 0.33 for the molar fraction of  $\gamma$ -CD ( $[\gamma\text{-CD}]_0 / ([\text{MABC}]_0 + [\gamma\text{-CD}]_0)$ ), indicating the formation of a 1:2 host-guest complex between  $\gamma$ -CD and MABC in water.

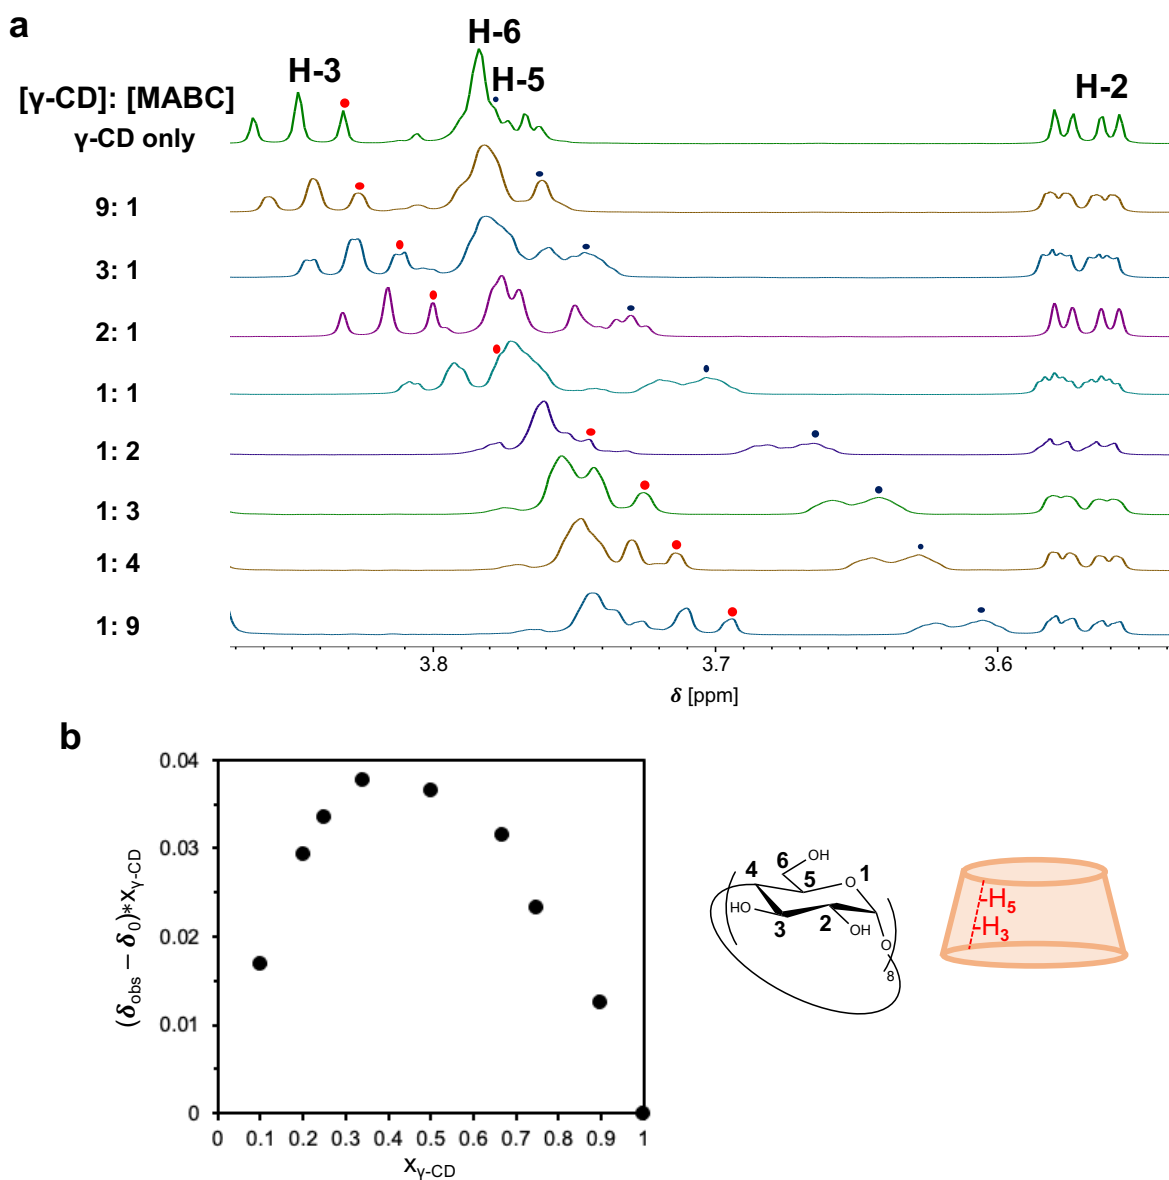

**Fig. S9** Partial  $^1\text{H}$  NMR (600 MHz,  $\text{D}_2\text{O}$ ) (a) of MABC and  $\gamma$ -CD at different ratios for Job plot of MABC and  $\gamma$ -CD complex, where the shifts in the peak attributable to the H-3 and H-5 protons of  $\gamma$ -CD were assigned against each molar fraction, and Job plot (b) of MABC and  $\gamma$ -CD, where the H-5 proton was plotted against the molar fraction of  $\gamma$ -CD (Inset shows chemical structure of  $\gamma$ -CD).

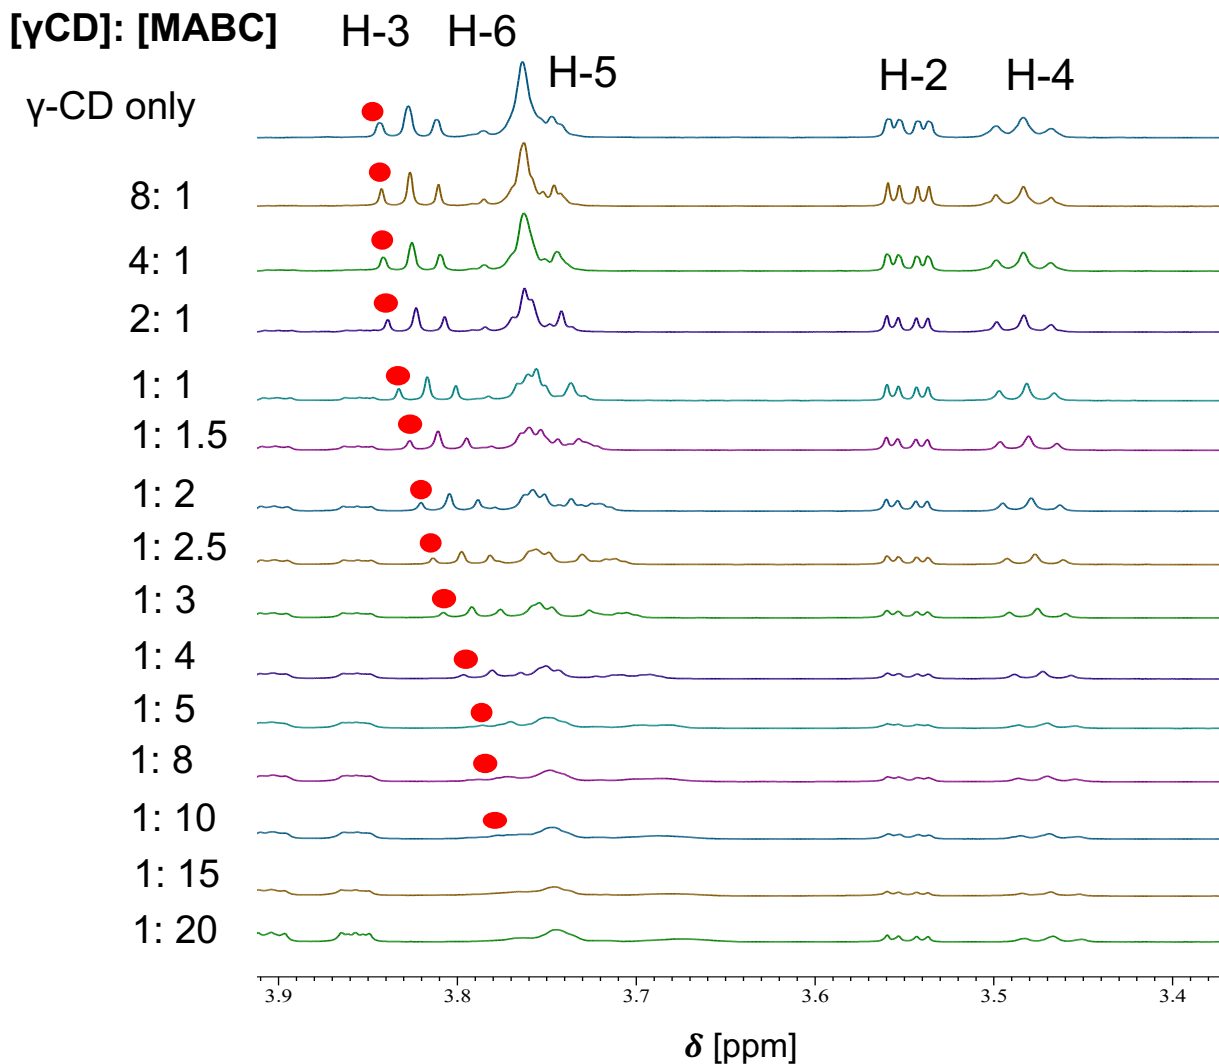

**Fig. S10** Partial <sup>1</sup>H NMR (600 MHz, D<sub>2</sub>O) of MABC and γ-CD at different ratios by NMR titration of γ-CD with added MABC, where the shift in the peak attributable to the H-3 proton of γ-CD was assigned against each molar fraction (The initial concentration of γ-CD, [γ-CD]<sub>0</sub> = 1.39 mM).

The titration results (shift changes vs. [guest]) of the host: guest complex were fit to equation [1] using non-linear least square fitting program.

$$\Delta\delta_{obs} = \frac{b[G]_0 (K_1\Delta\delta_1 [H] + K_1K_2\Delta\delta_2 [H]^2)}{1 + K_1 [H] + K_1K_2 [H]^2} \dots [1]$$

$K_1$  and  $K_2$  are stepwise association constants for the 1:1 and 1:2 host–guest complexes, respectively.



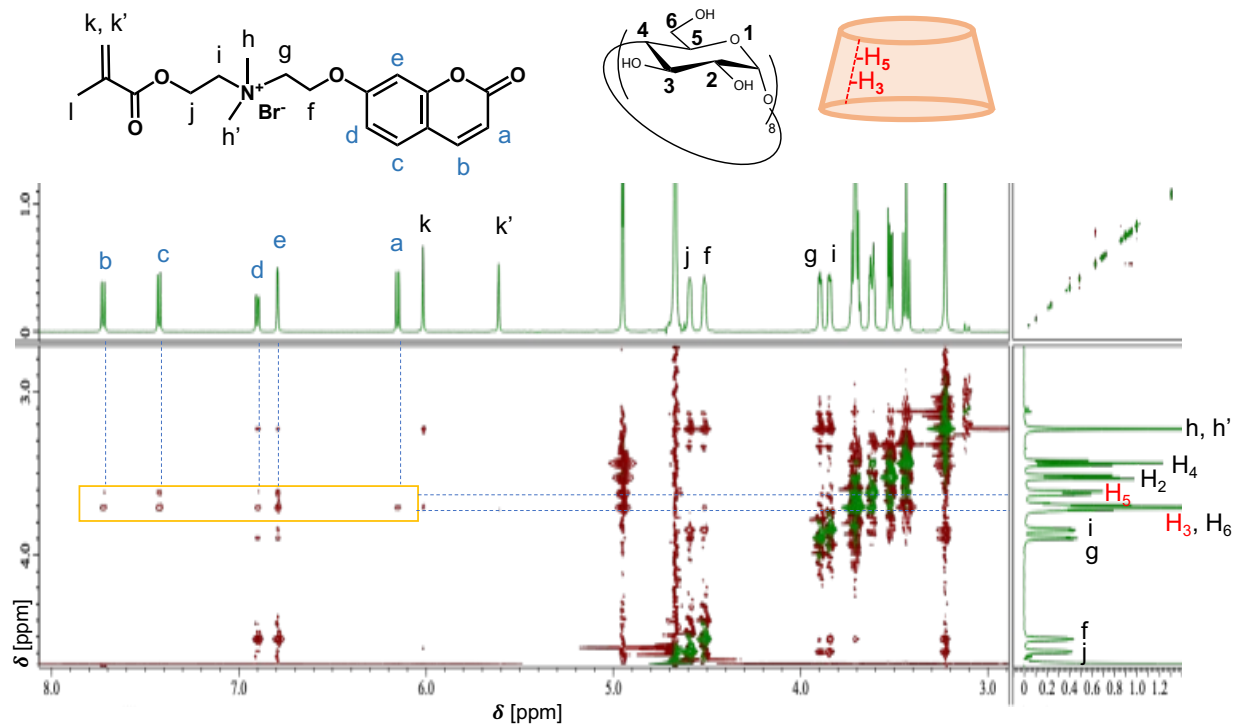

**Fig. S11** Partial ROESY spectrum ( $\text{D}_2\text{O}$ , 25 °C) of MABC and  $\gamma$ -CD inclusion complex ( $[\text{MABC}]_0: [\gamma\text{-CD}]_0 = 2:1$ , fixed at 11.76 mM).

### 3. Photodimerization of guest monomer with or without $\gamma$ -CD host

The dilute MABC monomer ( $1.0 \times 10^{-4}$  M) with or without the  $\gamma$ -CD (0.5 equiv.) host in aqueous solution was irradiated with UVA light, centred around 365 nm in a UV crosslinker chamber for a given time to evaluate the photo-dimerization behaviour by tracing the decrease in the intensity of the absorbance peak corresponding to the coumarin moiety at 321 nm.

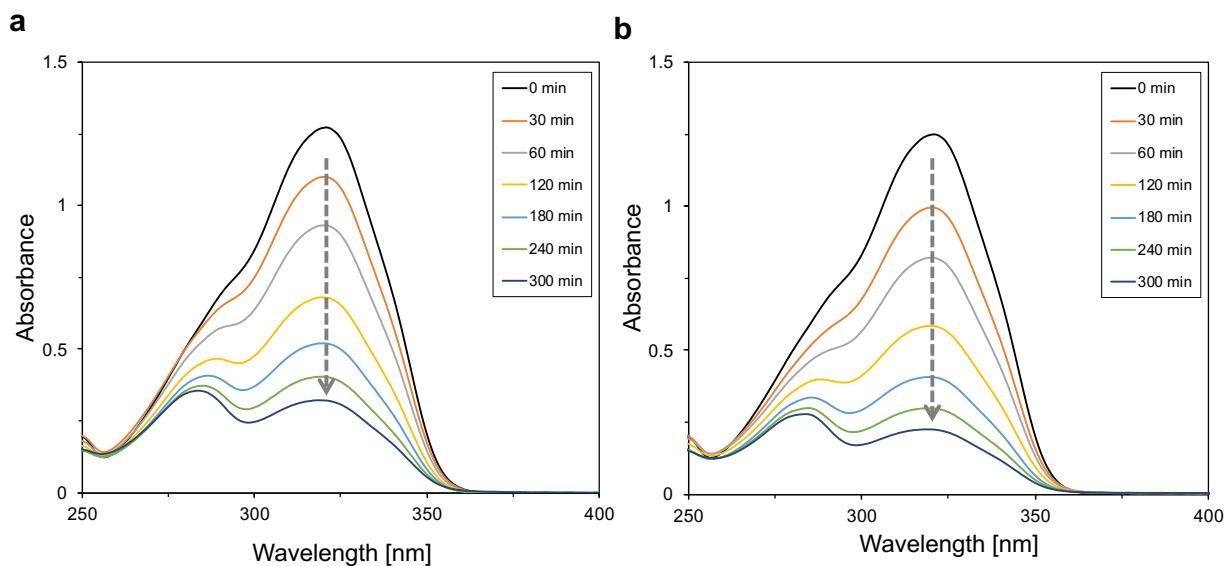

**Fig. S12** Changes in the absorption spectra of (a) MABC and (b) the MABC/ $\gamma$ -CD (molar ratio = 2:1) complex in aqueous solution following photo-irradiation at 365 nm;  $[MABC]_0 = 1.0 \times 10^{-5}$  M, 25 °C.

#### 4. Photographs of polymerization products

In a control experiment comprising the polymerization of DMAEMA-MABC comonomers without  $\gamma$ -CD and only DMAEMA monomer, the inversion methods revealed that fluid sol products were formed, resulting from the formation of a linear copolymer. In all cases, bulk hydrogels comprising crosslinked 3D networks were not formed, although their viscosities increased during polymerizations.

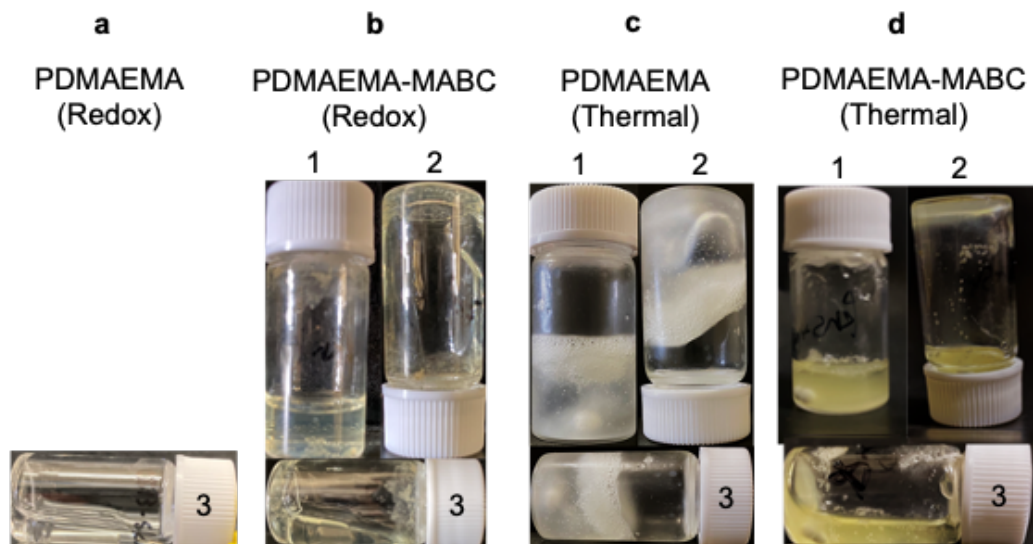

**Fig. S13** Photographs of polymer products prepared by redox (a, b) and thermal (c, d) polymerizations of DMAEMA (a, c) or DMAEMA-MABC (b, d) comonomer (**1**: standing vertically, **2**: invert **1** to 180°, **3**: invert **1** to 90°).

## 5. FT-IR spectroscopy

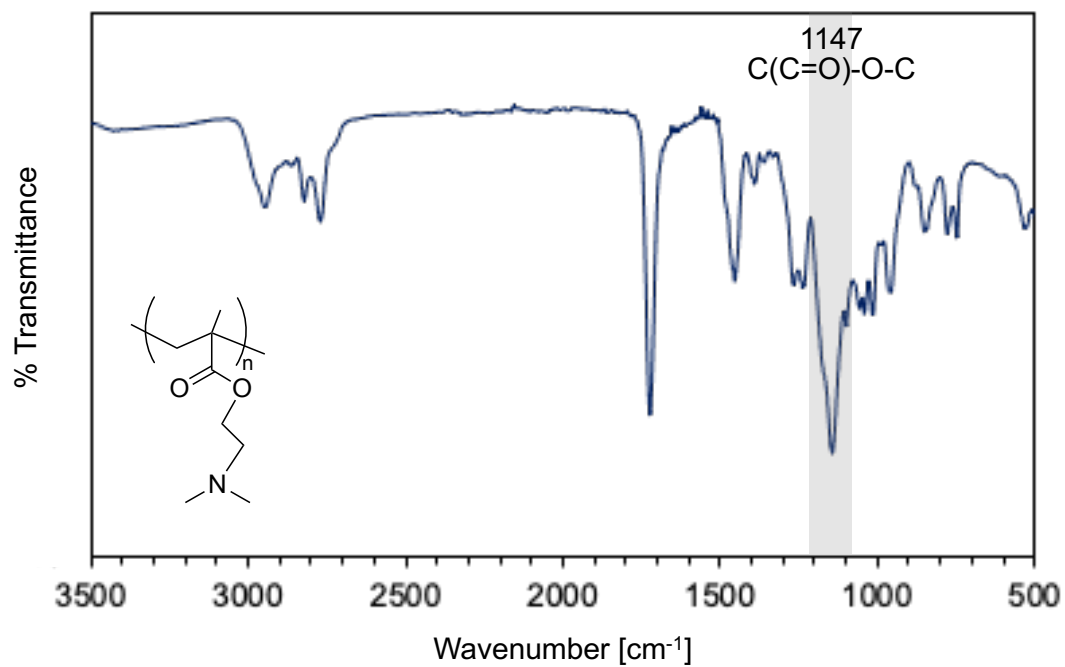

**Fig. S14** FT-IR transmittance spectra of PDMAEMA (Inset shows chemical structure of PDMAEMA).

## 6. Characterization of PDMAEMA-MABC by redox polymerization

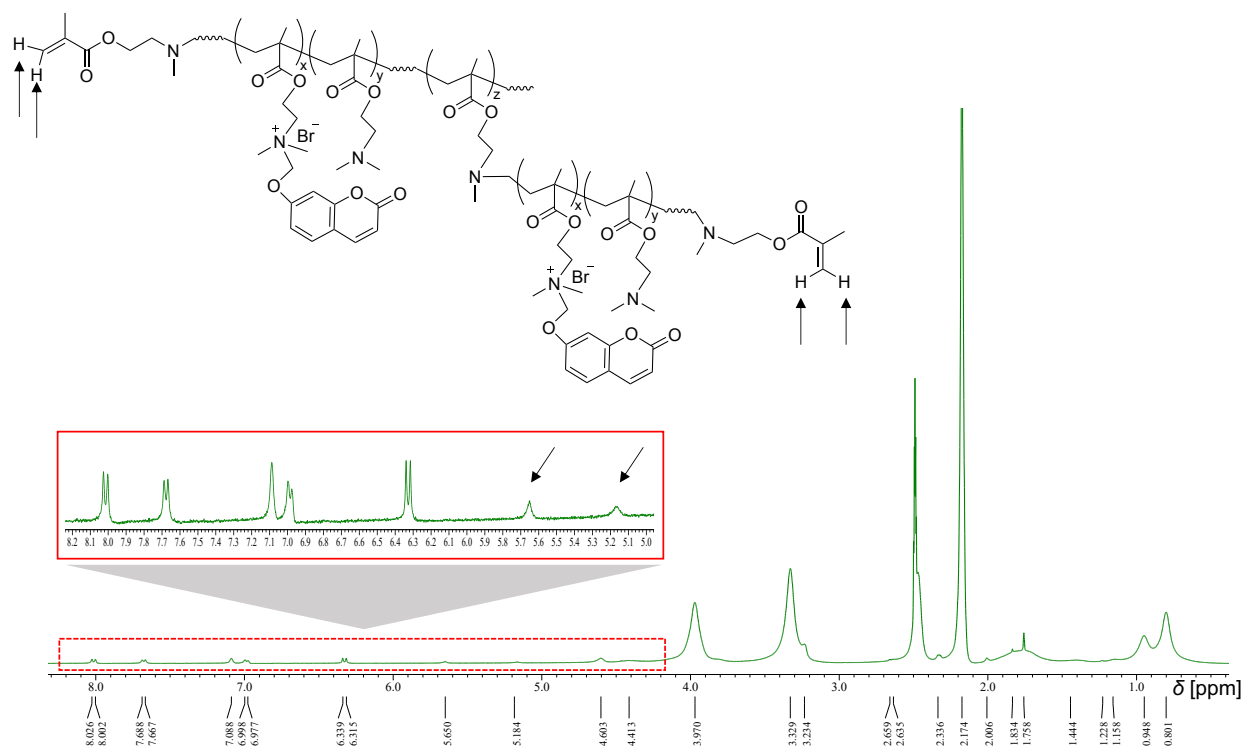

**Fig. S15** <sup>1</sup>H NMR (600 MHz, DMSO-*d*<sub>6</sub>) spectrum of PDMAEMA-MABC formed by redox polymerization with an APS-DMAEMA initiating system: the inset is the possible branching structure. The inset arrows show polymer chain residues corresponding to the C=C double bonds.

## 7. Characterization of rheological property of PDMAEMA-MABC

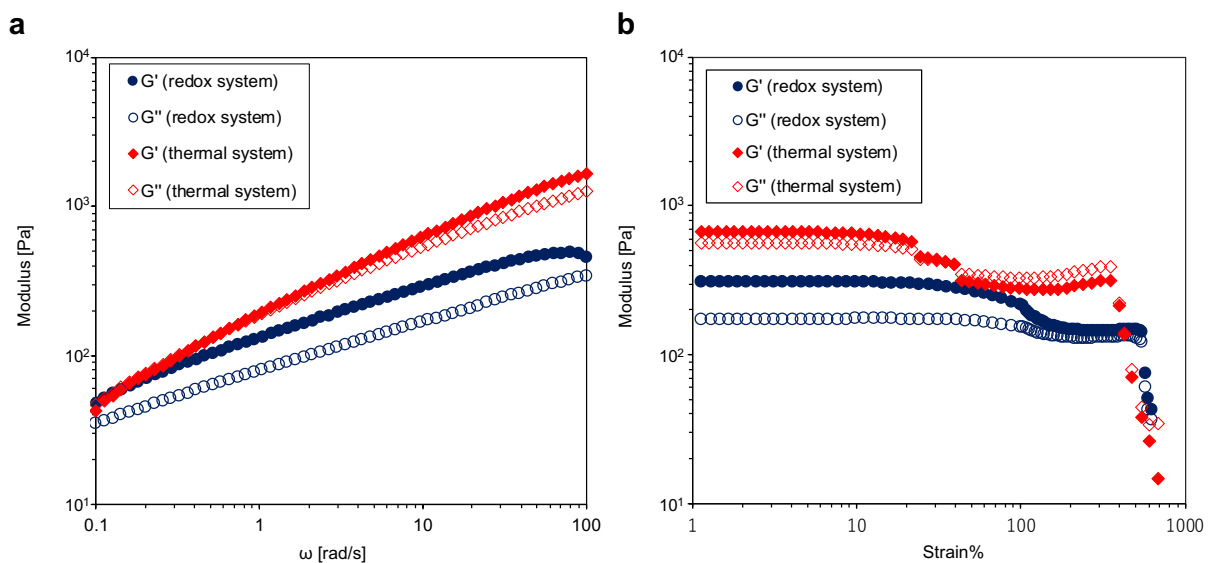

**Fig. S16** Frequency (a) and strain sweep (b) measurements for PDMAEMA-MABC obtained by redox or thermal polymerization followed by irradiation with UV (365 nm).

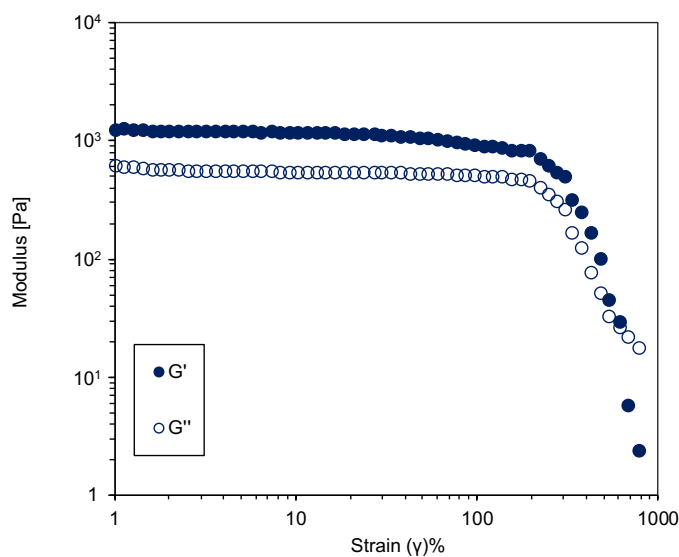

**Fig. S17** Strain sweep measurements of non-covalent PDMAEMA-MABC/ $\gamma$ -CD hydrogel obtained by thermal polymerization (strain ( $\gamma$ ) = 1% to 1000%,  $\omega$  = 10 rad/s).

## 8. Characterization of thermo-responsive property of PDMAEMA-MABC/ $\gamma$ -CD hydrogel

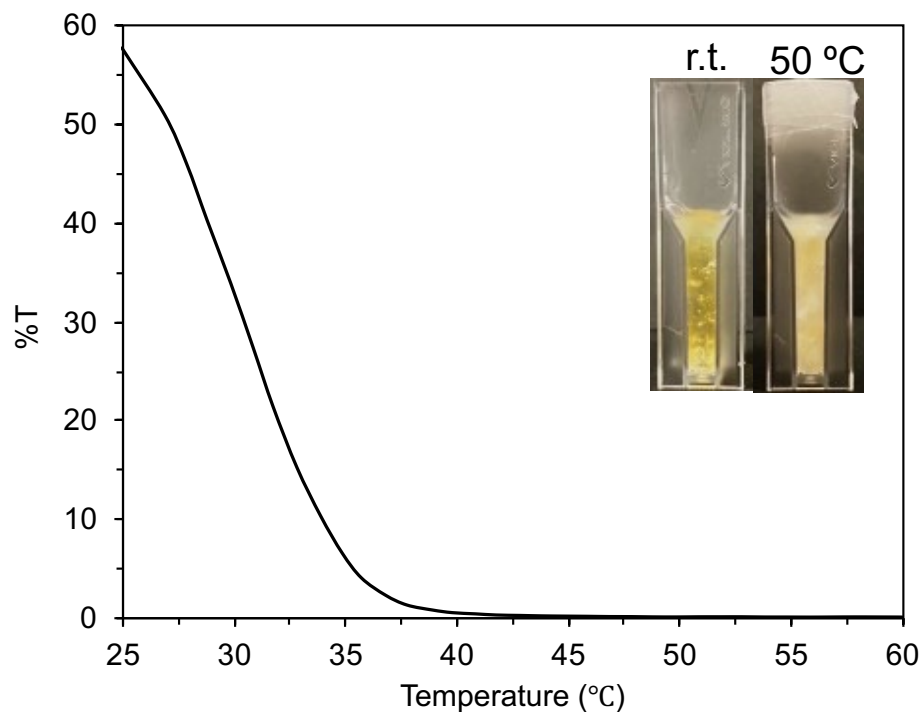

**Fig. S18** Temperature-%T curves of covalent PDMAEMA-MABC/ $\gamma$ -CD hydrogel after photo-dimerization of the coumarin moiety: the insets are photo images of the hydrogels at room temperature and 50 °C.
